# Supplementary material
Source: publisher figshare collection journal article supplement (https://gsajournals.figshare.com/ndownloader/files/14218913)
Supplement: Supplementary file 1 [file 14218913]

Breeding_Cycle,Managed_Treatment,Model,Prediction_Accuracy,Standard_Deviation,Prediction_Accuracy_DTHD_Correction,Standard_Deviation_DTHD_Correction
2013-14,Optimal Bed,G,0.363423338,0.018543641,0.404434946,0.017909973
2013-14,Optimal Bed,A,0.352513171,0.016005731,0.393851647,0.015399725
2013-14,Optimal Bed,G + G GxE,0.314070765,0.019797253,0.342125293,0.020984864
2013-14,Optimal Bed,A + A GxE,0.327926777,0.022628936,0.35639155,0.021941751
2013-14,Optimal Bed,H.VEG,0.227150525,0.025743562,0.166945821,0.027348007
2013-14,Optimal Bed,G + H.VEG GxE,0.417727518,0.018013152,0.397805097,0.025255332
2013-14,Optimal Bed,A + H.VEG GxE,0.417132434,0.016861319,0.397693044,0.022900294
2013-14,Optimal Bed,H.HEAD,0.299190198,0.035951093,0.245126474,0.040658528
2013-14,Optimal Bed,G + H.HEAD GxE,0.474730041,0.026847713,0.446751399,0.028039165
2013-14,Optimal Bed,A + H.HEAD GxE,0.46217557,0.025283012,0.433333216,0.027416826
2013-14,Optimal Bed,H.GF,0.26353426,0.015196349,0.21535853,0.014357909
2013-14,Optimal Bed,G + H.GF GxE,0.454385285,0.018721872,0.425171089,0.019391165
2013-14,Optimal Bed,A + H.GF GxE,0.442397036,0.019050303,0.411856992,0.019244756
2013-14,Optimal Bed,H.ALL,0.274486277,0.016901666,0.219705782,0.022516041
2013-14,Optimal Bed,G + H.ALL GxE,0.458866909,0.01630887,0.425236264,0.017868743
2013-14,Optimal Bed,A + H.ALL GxE,0.452010167,0.016853446,0.417991096,0.017953621
2013-14,Optimal Flat,G,0.334159913,0.015493522,0.284138857,0.0163129
2013-14,Optimal Flat,A,0.305858097,0.018299563,0.255343251,0.018984248
2013-14,Optimal Flat,G + G GxE,0.27103444,0.049782852,0.236605658,0.051595856
2013-14,Optimal Flat,A + A GxE,0.238396747,0.049082117,0.208273334,0.048921027
2013-14,Optimal Flat,H.VEG,0.016763634,0.048165931,0.011913762,0.05086246
2013-14,Optimal Flat,G + H.VEG GxE,0.194262372,0.055717789,0.16186244,0.05146559
2013-14,Optimal Flat,A + H.VEG GxE,0.179830605,0.048165546,0.146290757,0.045569352
2013-14,Optimal Flat,H.HEAD,0.060975925,0.031365905,0.05989457,0.032240679
2013-14,Optimal Flat,G + H.HEAD GxE,0.201730927,0.047260529,0.176000475,0.043029133
2013-14,Optimal Flat,A + H.HEAD GxE,0.191372828,0.045177988,0.165091142,0.040234001
2013-14,Optimal Flat,H.GF,0.014612861,0.051194503,0.024503894,0.048624143
2013-14,Optimal Flat,G + H.GF GxE,0.221745838,0.047317278,0.209156176,0.045634304
2013-14,Optimal Flat,A + H.GF GxE,0.20852628,0.047094017,0.196207095,0.045757595
2013-14,Optimal Flat,H.ALL,0.029832773,0.030316841,0.037053574,0.033493755
2013-14,Optimal Flat,G + H.ALL GxE,0.205006473,0.033669932,0.187498433,0.033359177
2013-14,Optimal Flat,A + H.ALL GxE,0.19321074,0.034049283,0.175401761,0.034242182
2013-14,Moderate Drought,G,0.453253569,0.021149738,0.40734733,0.017480015
2013-14,Moderate Drought,A,0.441201508,0.019799622,0.395594061,0.017444168
2013-14,Moderate Drought,G + G GxE,0.518410029,0.02771488,0.403259991,0.035577262
2013-14,Moderate Drought,A + A GxE,0.513529147,0.026977777,0.39481711,0.042280729
2013-14,Moderate Drought,H.VEG,0.286101802,0.031289988,-0.017968726,0.036266078
2013-14,Moderate Drought,G + H.VEG GxE,0.524049959,0.023599718,0.340946262,0.038019822
2013-14,Moderate Drought,A + H.VEG GxE,0.519056829,0.026943618,0.346035776,0.03502189
2013-14,Moderate Drought,H.HEAD,0.30609039,0.029754174,-0.065926465,0.032307345
2013-14,Moderate Drought,G + H.HEAD GxE,0.547372153,0.015362663,0.323635861,0.042067474
2013-14,Moderate Drought,A + H.HEAD GxE,0.542410223,0.017129644,0.322396773,0.044141337
2013-14,Moderate Drought,H.GF,0.326975636,0.021227623,-0.094773062,0.029421746
2013-14,Moderate Drought,G + H.GF GxE,0.530774183,0.023702166,0.350226774,0.037187967
2013-14,Moderate Drought,A + H.GF GxE,0.52666822,0.024889495,0.344320344,0.036150686
2013-14,Moderate Drought,H.ALL,0.314877403,0.023654334,-0.096134245,0.025145829
2013-14,Moderate Drought,G + H.ALL GxE,0.570326434,0.014941164,0.319176015,0.042167041
2013-14,Moderate Drought,A + H.ALL GxE,0.563360685,0.021491219,0.317619589,0.039456062
2013-14,Severe Drought,G,0.330269492,0.019366524,0.401872623,0.015589962
2013-14,Severe Drought,A,0.316587291,0.023209944,0.387391507,0.01856867
2013-14,Severe Drought,G + G GxE,0.467255408,0.029399685,0.331129897,0.049210867
2013-14,Severe Drought,A + A GxE,0.506859796,0.028877904,0.328530494,0.033493573
2013-14,Severe Drought,H.VEG,0.432086059,0.014567956,0.016480896,0.016448974
2013-14,Severe Drought,G + H.VEG GxE,0.542676435,0.018181661,0.279642369,0.034275035
2013-14,Severe Drought,A + H.VEG GxE,0.522972628,0.0194627,0.271058774,0.034681993
2013-14,Severe Drought,H.HEAD,0.45478121,0.033322552,0.049287942,0.04646181
2013-14,Severe Drought,G + H.HEAD GxE,0.57256036,0.02464388,0.293548815,0.046695913
2013-14,Severe Drought,A + H.HEAD GxE,0.558258771,0.026795911,0.286838478,0.049653945
2013-14,Severe Drought,H.GF,0.568586955,0.016243808,0.099871758,0.025537076
2013-14,Severe Drought,G + H.GF GxE,0.6488381,0.015534273,0.320641833,0.034163381
2013-14,Severe Drought,A + H.GF GxE,0.63840679,0.01738609,0.317106517,0.032794639
2013-14,Severe Drought,H.ALL,0.54133637,0.019687056,0.07763891,0.026435475
2013-14,Severe Drought,G + H.ALL GxE,0.647450616,0.017416944,0.303009349,0.037494191
2013-14,Severe Drought,A + H.ALL GxE,0.634981601,0.020041211,0.29887697,0.035547673
2013-14,Heat,G,0.34602584,0.018594037,0.339679641,0.017878066
2013-14,Heat,A,0.340572042,0.015217974,0.337094517,0.01566462
2013-14,Heat,G + G GxE,0.425045073,0.026487432,0.349073983,0.029549894
2013-14,Heat,A + A GxE,0.402540034,0.030423632,0.334109626,0.035383291
2013-14,Heat,H.VEG,0.578045523,0.024981937,0.571048299,0.040496208
2013-14,Heat,G + H.VEG GxE,0.612378402,0.020383801,0.596779477,0.025070032
2013-14,Heat,A + H.VEG GxE,0.608830356,0.018535194,0.594066945,0.027404908
2013-14,Heat,H.HEAD,0.542002674,0.018991505,0.532228299,0.034446385
2013-14,Heat,G + H.HEAD GxE,0.611778701,0.01802112,0.590374385,0.029248208
2013-14,Heat,A + H.HEAD GxE,0.612115661,0.015003323,0.595986507,0.027132821
2013-14,Heat,H.GF,0.131884648,0.037404429,0.020636517,0.047070472
2013-14,Heat,G + H.GF GxE,0.395895321,0.023258253,0.343410313,0.030979319
2013-14,Heat,A + H.GF GxE,0.402867179,0.024288214,0.354844135,0.033870328
2013-14,Heat,H.ALL,0.390292127,0.04619497,0.447234278,0.070768361
2013-14,Heat,G + H.ALL GxE,0.489764753,0.031454409,0.513646865,0.044919661
2013-14,Heat,A + H.ALL GxE,0.493338397,0.0279286,0.522050606,0.043347206
2014-15,Optimal Bed,G,0.596986505,0.010015249,0.518459519,0.012002822
2014-15,Optimal Bed,A,0.565045251,0.010697513,0.484128864,0.012849888
2014-15,Optimal Bed,G + G GxE,0.562258588,0.019349887,0.48848913,0.018447278
2014-15,Optimal Bed,A + A GxE,0.516518886,0.018591409,0.452676558,0.021465544
2014-15,Optimal Bed,H.VEG,0.301649116,0.02049631,0.164194905,0.032782308
2014-15,Optimal Bed,G + H.VEG GxE,0.602544558,0.016219433,0.476964719,0.027378345
2014-15,Optimal Bed,A + H.VEG GxE,0.568811896,0.014398866,0.444895801,0.025179444
2014-15,Optimal Bed,H.HEAD,0.536219509,0.015719648,0.326208137,0.028489278
2014-15,Optimal Bed,G + H.HEAD GxE,0.686516708,0.015373764,0.507384219,0.026373845
2014-15,Optimal Bed,A + H.HEAD GxE,0.665819886,0.015420935,0.489234046,0.028018695
2014-15,Optimal Bed,H.GF,0.592784033,0.01587393,0.354078903,0.019470986
2014-15,Optimal Bed,G + H.GF GxE,0.709313686,0.012368733,0.523200035,0.019285153
2014-15,Optimal Bed,A + H.GF GxE,0.696643686,0.012406662,0.509142161,0.020100191
2014-15,Optimal Bed,H.ALL,0.588876874,0.014732374,0.357223385,0.021202592
2014-15,Optimal Bed,G + H.ALL GxE,0.702177717,0.012665513,0.520403562,0.022479369
2014-15,Optimal Bed,A + H.ALL GxE,0.691737543,0.012027832,0.509863158,0.022500779
2014-15,Optimal Flat,G,0.492541674,0.015303198,0.492401691,0.015312046
2014-15,Optimal Flat,A,0.477488693,0.014015693,0.477329282,0.014025146
2014-15,Optimal Flat,G + G GxE,0.49736589,0.022505957,0.497174091,0.022531183
2014-15,Optimal Flat,A + A GxE,0.466118025,0.024900806,0.465834164,0.02491269
2014-15,Optimal Flat,H.VEG,0.127015678,0.039299789,0.126960531,0.039299182
2014-15,Optimal Flat,G + H.VEG GxE,0.49301698,0.021317697,0.492866857,0.021326278
2014-15,Optimal Flat,A + H.VEG GxE,0.475969336,0.02043559,0.475802696,0.020442659
2014-15,Optimal Flat,H.HEAD,0.354778224,0.023832689,0.354601501,0.023831903
2014-15,Optimal Flat,G + H.HEAD GxE,0.521504048,0.023125433,0.521307514,0.023133389
2014-15,Optimal Flat,A + H.HEAD GxE,0.511245377,0.019912567,0.51104628,0.019921261
2014-15,Optimal Flat,H.GF,0.516974205,0.030867664,0.516725814,0.030866183
2014-15,Optimal Flat,G + H.GF GxE,0.615664213,0.023880996,0.615427475,0.023885515
2014-15,Optimal Flat,A + H.GF GxE,0.615646569,0.027330946,0.615410281,0.027338013
2014-15,Optimal Flat,H.ALL,0.498222997,0.016816636,0.497981842,0.016813898
2014-15,Optimal Flat,G + H.ALL GxE,0.605804604,0.014628656,0.605570864,0.014628514
2014-15,Optimal Flat,A + H.ALL GxE,0.602256935,0.013763328,0.602025647,0.013763363
2014-15,Moderate Drought,G,0.508825741,0.016901611,0.480252885,0.017902319
2014-15,Moderate Drought,A,0.480508735,0.017933712,0.452554869,0.018717857
2014-15,Moderate Drought,G + G GxE,0.53236592,0.018312238,0.507561274,0.019404152
2014-15,Moderate Drought,A + A GxE,0.5311771,0.021119282,0.508653498,0.021773051
2014-15,Moderate Drought,H.VEG,0.252303376,0.026501187,0.218317339,0.025793976
2014-15,Moderate Drought,G + H.VEG GxE,0.517043957,0.014785132,0.488620632,0.015913844
2014-15,Moderate Drought,A + H.VEG GxE,0.489443964,0.015658288,0.461819209,0.016632579
2014-15,Moderate Drought,H.HEAD,0.289916987,0.016861069,0.253482369,0.018054263
2014-15,Moderate Drought,G + H.HEAD GxE,0.508394801,0.014967026,0.486126704,0.017504278
2014-15,Moderate Drought,A + H.HEAD GxE,0.480757335,0.015138633,0.459677123,0.017543601
2014-15,Moderate Drought,H.GF,0.305866485,0.014086977,0.273266846,0.014156337
2014-15,Moderate Drought,G + H.GF GxE,0.571894997,0.015388421,0.55481191,0.019847118
2014-15,Moderate Drought,A + H.GF GxE,0.540041374,0.015395989,0.524088388,0.01961006
2014-15,Moderate Drought,H.ALL,0.335276684,0.013338911,0.283426905,0.014999162
2014-15,Moderate Drought,G + H.ALL GxE,0.57038034,0.014255139,0.546250384,0.017329865
2014-15,Moderate Drought,A + H.ALL GxE,0.542744286,0.01501511,0.518774976,0.017280144
2014-15,Severe Drought,G,0.299528117,0.010629174,0.309471015,0.010635993
2014-15,Severe Drought,A,0.273994572,0.011523633,0.283489115,0.011619986
2014-15,Severe Drought,G + G GxE,0.372946431,0.012620107,0.379453722,0.012617992
2014-15,Severe Drought,A + A GxE,0.379609389,0.016672781,0.384965063,0.016654428
2014-15,Severe Drought,H.VEG,0.136233717,0.024394431,0.136198517,0.026550904
2014-15,Severe Drought,G + H.VEG GxE,0.326705192,0.009741216,0.335362202,0.009893411
2014-15,Severe Drought,A + H.VEG GxE,0.297084645,0.009551645,0.305431753,0.010151203
2014-15,Severe Drought,H.HEAD,0.18148443,0.029409458,0.189397693,0.029817421
2014-15,Severe Drought,G + H.HEAD GxE,0.31851459,0.010208974,0.32530741,0.010776934
2014-15,Severe Drought,A + H.HEAD GxE,0.291096535,0.011174705,0.297566581,0.011746957
2014-15,Severe Drought,H.GF,0.107497205,0.039421443,0.117781879,0.047247448
2014-15,Severe Drought,G + H.GF GxE,0.329570579,0.020808576,0.334541195,0.022003816
2014-15,Severe Drought,A + H.GF GxE,0.320501874,0.030091453,0.324832434,0.030637217
2014-15,Severe Drought,H.ALL,0.152328494,0.027022746,0.160395162,0.029391537
2014-15,Severe Drought,G + H.ALL GxE,0.3471322,0.010846463,0.351426814,0.011345195
2014-15,Severe Drought,A + H.ALL GxE,0.328332321,0.012080935,0.332929257,0.012830012
2014-15,Heat,G,0.35156038,0.010922625,0.307837599,0.011264879
2014-15,Heat,A,0.329376482,0.01278229,0.28631333,0.013366342
2014-15,Heat,G + G GxE,0.38605091,0.013727225,0.357465501,0.012833012
2014-15,Heat,A + A GxE,0.384470459,0.021123464,0.361914317,0.023851231
2014-15,Heat,H.VEG,0.417935425,0.014168337,0.408220868,0.023982392
2014-15,Heat,G + H.VEG GxE,0.509841734,0.013993792,0.490793038,0.018284173
2014-15,Heat,A + H.VEG GxE,0.494848101,0.016066464,0.476350834,0.020300057
2014-15,Heat,H.HEAD,0.531601424,0.018121064,0.513454529,0.025665357
2014-15,Heat,G + H.HEAD GxE,0.578472425,0.014342488,0.561313053,0.021441432
2014-15,Heat,A + H.HEAD GxE,0.563214845,0.015457902,0.546488077,0.022178366
2014-15,Heat,H.GF,0.411510166,0.035270131,0.353072656,0.040268163
2014-15,Heat,G + H.GF GxE,0.505526584,0.01990834,0.457326856,0.021597763
2014-15,Heat,A + H.GF GxE,0.493529387,0.023010993,0.44597647,0.024607029
2014-15,Heat,H.ALL,0.500079326,0.01505916,0.462252581,0.023893789
2014-15,Heat,G + H.ALL GxE,0.572341059,0.011299501,0.54390362,0.01769019
2014-15,Heat,A + H.ALL GxE,0.558842387,0.013407383,0.529693193,0.019875787
2015-16,Optimal Bed,G,0.352203365,0.014510454,0.397050703,0.013972932
2015-16,Optimal Bed,A,0.342779188,0.009868885,0.385072873,0.009516717
2015-16,Optimal Bed,G + G GxE,0.339998415,0.018767299,0.373356774,0.019550691
2015-16,Optimal Bed,A + A GxE,0.334257742,0.019350488,0.369479219,0.019096315
2015-16,Optimal Bed,H.HEAD,0.297015678,0.018101989,0.24180064,0.017497267
2015-16,Optimal Bed,G + H.HEAD GxE,0.53613403,0.017774889,0.531170142,0.021273414
2015-16,Optimal Bed,A + H.HEAD GxE,0.520929711,0.020272655,0.514632593,0.022919787
2015-16,Optimal Bed,H.GF,0.281920965,0.017236459,0.230282634,0.016341614
2015-16,Optimal Bed,G + H.GF GxE,0.49839963,0.019102641,0.48241657,0.021681977
2015-16,Optimal Bed,A + H.GF GxE,0.475077054,0.016770177,0.459772422,0.018182494
2015-16,Optimal Bed,H.ALL,0.303206546,0.015845159,0.248576312,0.015763765
2015-16,Optimal Bed,G + H.ALL GxE,0.521498069,0.018840689,0.498795932,0.021553329
2015-16,Optimal Bed,A + H.ALL GxE,0.499548893,0.018947894,0.477378236,0.021645214
2015-16,Optimal Flat,G,0.192379307,0.011978313,0.110068625,0.010621631
2015-16,Optimal Flat,A,0.170755925,0.012160892,0.100943078,0.011357616
2015-16,Optimal Flat,G + G GxE,0.281400806,0.028999033,0.295520379,0.026876563
2015-16,Optimal Flat,A + A GxE,0.250215811,0.031220191,0.293807731,0.037847444
2015-16,Optimal Flat,H.HEAD,0.115954205,0.021095343,0.11589856,0.048169652
2015-16,Optimal Flat,G + H.HEAD GxE,0.264012699,0.021240164,0.249764215,0.038227986
2015-16,Optimal Flat,A + H.HEAD GxE,0.246255366,0.017396444,0.247553247,0.039550044
2015-16,Optimal Flat,H.GF,0.517832811,0.017397569,0.552615441,0.021769498
2015-16,Optimal Flat,G + H.GF GxE,0.570309625,0.015380127,0.593872157,0.01790663
2015-16,Optimal Flat,A + H.GF GxE,0.564332115,0.01509327,0.591374149,0.017071308
2015-16,Optimal Flat,H.ALL,0.510373326,0.021107244,0.540382024,0.020330293
2015-16,Optimal Flat,G + H.ALL GxE,0.560439428,0.018708969,0.583357816,0.015501547
2015-16,Optimal Flat,A + H.ALL GxE,0.552765537,0.017815462,0.579503666,0.015593289
2015-16,Moderate Drought,G,0.433874521,0.015759626,0.350030251,0.018732409
2015-16,Moderate Drought,A,0.427835087,0.013137503,0.347990593,0.014874844
2015-16,Moderate Drought,G + G GxE,0.41372904,0.026517421,0.352675633,0.02907841
2015-16,Moderate Drought,A + A GxE,0.419890777,0.021319084,0.365164789,0.026205805
2015-16,Moderate Drought,H.GF,0.373191654,0.017595457,0.092720533,0.041322224
2015-16,Moderate Drought,G + H.GF GxE,0.512814579,0.012628807,0.341047018,0.041489093
2015-16,Moderate Drought,A + H.GF GxE,0.502922857,0.012865291,0.329831509,0.039085525
2015-16,Moderate Drought,H.ALL,0.373355505,0.017236501,0.093600892,0.038736846
2015-16,Moderate Drought,G + H.ALL GxE,0.508443862,0.012620511,0.338504246,0.04242852
2015-16,Moderate Drought,A + H.ALL GxE,0.499034296,0.012103247,0.328218376,0.040128054
2015-16,Severe Drought,G,0.323905708,0.016120686,0.299974567,0.014600409
2015-16,Severe Drought,A,0.311996949,0.016614556,0.293568332,0.014783454
2015-16,Severe Drought,G + G GxE,0.431519836,0.025084383,0.353735092,0.024859806
2015-16,Severe Drought,A + A GxE,0.430399461,0.020527655,0.367738526,0.020881142
2015-16,Severe Drought,H.GF,0.645875718,0.014829556,0.177888272,0.022726578
2015-16,Severe Drought,G + H.GF GxE,0.695628232,0.014968978,0.291994688,0.024223042
2015-16,Severe Drought,A + H.GF GxE,0.69707233,0.01796686,0.298657003,0.024784285
2015-16,Severe Drought,H.ALL,0.647156679,0.015121673,0.180593362,0.021270656
2015-16,Severe Drought,G + H.ALL GxE,0.698058091,0.016342879,0.298478957,0.02577846
2015-16,Severe Drought,A + H.ALL GxE,0.699000335,0.018664004,0.302406457,0.027009638
2015-16,Heat,G,0.173975135,0.019809176,0.174656171,0.020507052
2015-16,Heat,A,0.173406809,0.017119448,0.180416476,0.017373447
2015-16,Heat,G + G GxE,0.414180649,0.029384413,0.418271002,0.030419582
2015-16,Heat,A + A GxE,0.365180952,0.02597251,0.379256654,0.033154436
2015-16,Heat,H.HEAD,0.623926499,0.009275716,0.62341904,0.009957464
2015-16,Heat,G + H.HEAD GxE,0.670411662,0.011967997,0.669537064,0.011980196
2015-16,Heat,A + H.HEAD GxE,0.673006786,0.013491156,0.675521034,0.013272818
2015-16,Heat,H.GF,0.516209658,0.024340281,0.503334518,0.023380646
2015-16,Heat,G + H.GF GxE,0.570748507,0.018164559,0.560064778,0.018169968
2015-16,Heat,A + H.GF GxE,0.57184177,0.019200605,0.560994148,0.019873898
2015-16,Heat,H.ALL,0.537205466,0.02964264,0.524396351,0.029591528
2015-16,Heat,G + H.ALL GxE,0.601440155,0.020730229,0.589884862,0.020845468
2015-16,Heat,A + H.ALL GxE,0.605080929,0.021784428,0.592665919,0.022234291
2016-17,Optimal Bed,G,0.228472858,0.016471619,0.327571933,0.016337503
2016-17,Optimal Bed,A,0.26322174,0.014629166,0.353063881,0.015827282
2016-17,Optimal Bed,G + G GxE,0.410979009,0.026372236,0.453700828,0.025240745
2016-17,Optimal Bed,A + A GxE,0.45671272,0.022547907,0.506776496,0.023793109
2016-17,Optimal Bed,H.VEG,0.704927298,0.00897766,0.658256486,0.014814168
2016-17,Optimal Bed,G + H.VEG GxE,0.743651759,0.009129724,0.748789412,0.011381148
2016-17,Optimal Bed,A + H.VEG GxE,0.746593034,0.008788148,0.746236578,0.011504244
2016-17,Optimal Bed,H.HEAD,0.708435611,0.013244168,0.622660754,0.025925094
2016-17,Optimal Bed,G + H.HEAD GxE,0.777344092,0.008256654,0.707189352,0.018641201
2016-17,Optimal Bed,A + H.HEAD GxE,0.774971949,0.008468608,0.700941606,0.018363501
2016-17,Optimal Bed,H.GF,0.673451827,0.021565392,0.588131569,0.028847539
2016-17,Optimal Bed,G + H.GF GxE,0.763606243,0.012874792,0.708052705,0.021034337
2016-17,Optimal Bed,A + H.GF GxE,0.759498212,0.013602755,0.699603779,0.022523839
2016-17,Optimal Bed,H.ALL,0.735044315,0.011431053,0.651085641,0.019499175
2016-17,Optimal Bed,G + H.ALL GxE,0.804548504,0.007947044,0.753346028,0.015313026
2016-17,Optimal Bed,A + H.ALL GxE,0.806153345,0.008738876,0.751346557,0.015572964
2016-17,Optimal Flat,G,0.411557905,0.0159784,0.372282771,0.015050386
2016-17,Optimal Flat,A,0.405352318,0.014225888,0.367288691,0.013646372
2016-17,Optimal Flat,G + G GxE,0.515086928,0.024720036,0.468281555,0.029709195
2016-17,Optimal Flat,A + A GxE,0.536654067,0.039658332,0.496630827,0.042277999
2016-17,Optimal Flat,H.VEG,0.535837916,0.017043889,0.434088581,0.024640885
2016-17,Optimal Flat,G + H.VEG GxE,0.629385498,0.013955828,0.531874272,0.021054454
2016-17,Optimal Flat,A + H.VEG GxE,0.62777529,0.014960651,0.52874799,0.020700932
2016-17,Optimal Flat,H.HEAD,0.546888777,0.016804484,0.447882424,0.022431074
2016-17,Optimal Flat,G + H.HEAD GxE,0.602450161,0.013211849,0.505618583,0.017181371
2016-17,Optimal Flat,A + H.HEAD GxE,0.60185357,0.014176983,0.504081932,0.018440947
2016-17,Optimal Flat,H.GF,0.46633075,0.021530189,0.401683956,0.023028598
2016-17,Optimal Flat,G + H.GF GxE,0.529302025,0.021392951,0.462927808,0.02234473
2016-17,Optimal Flat,A + H.GF GxE,0.532664617,0.023023576,0.465894228,0.02273775
2016-17,Optimal Flat,H.ALL,0.548395573,0.018618131,0.449233834,0.028518789
2016-17,Optimal Flat,G + H.ALL GxE,0.625289065,0.015853272,0.528711964,0.022254253
2016-17,Optimal Flat,A + H.ALL GxE,0.632975712,0.017408606,0.535930403,0.022598532
2016-17,Moderate Drought,G,0.408730911,0.011045778,0.300812377,0.012917402
2016-17,Moderate Drought,A,0.388294476,0.010324014,0.28925145,0.01227086
2016-17,Moderate Drought,G + G GxE,0.545468769,0.020444972,0.423349588,0.017387604
2016-17,Moderate Drought,A + A GxE,0.551310961,0.022112219,0.453007899,0.021657199
2016-17,Moderate Drought,H.VEG,0.341201595,0.021415997,0.231460758,0.070102897
2016-17,Moderate Drought,G + H.VEG GxE,0.5589819,0.019148374,0.440532848,0.035337731
2016-17,Moderate Drought,A + H.VEG GxE,0.56359659,0.018101062,0.452503029,0.034865543
2016-17,Moderate Drought,H.HEAD,0.515928629,0.016218943,0.256259298,0.036598902
2016-17,Moderate Drought,G + H.HEAD GxE,0.604748641,0.015305959,0.396585628,0.036194789
2016-17,Moderate Drought,A + H.HEAD GxE,0.609379695,0.016047038,0.402956601,0.035804018
2016-17,Moderate Drought,H.GF,0.509793838,0.021935123,0.23325359,0.036542738
2016-17,Moderate Drought,G + H.GF GxE,0.628819216,0.01261068,0.407628117,0.029309135
2016-17,Moderate Drought,A + H.GF GxE,0.633448701,0.013649628,0.417186549,0.029258556
2016-17,Moderate Drought,H.ALL,0.471176849,0.034103291,0.245372003,0.054248443
2016-17,Moderate Drought,G + H.ALL GxE,0.576668612,0.028686146,0.395000275,0.043555411
2016-17,Moderate Drought,A + H.ALL GxE,0.585428173,0.028760715,0.409349052,0.045403599
2016-17,Severe Drought,G,0.252127995,0.015050418,0.136289251,0.014720195
2016-17,Severe Drought,A,0.260499171,0.016231487,0.158536966,0.015682376
2016-17,Severe Drought,G + G GxE,0.430958694,0.026358475,0.334319974,0.037235095
2016-17,Severe Drought,A + A GxE,0.488054441,0.028697835,0.416287281,0.039926159
2016-17,Severe Drought,H.VEG,0.477925617,0.027798019,0.592490454,0.017526161
2016-17,Severe Drought,G + H.VEG GxE,0.573014613,0.014972241,0.590601145,0.022562395
2016-17,Severe Drought,A + H.VEG GxE,0.564200694,0.01925656,0.588225697,0.025893863
2016-17,Severe Drought,H.HEAD,0.634836418,0.038079765,0.612681398,0.02650042
2016-17,Severe Drought,G + H.HEAD GxE,0.684811935,0.017598019,0.644505786,0.018434709
2016-17,Severe Drought,A + H.HEAD GxE,0.676403299,0.017318175,0.637469483,0.020433958
2016-17,Severe Drought,H.GF,0.628490091,0.024807448,0.626250632,0.037114854
2016-17,Severe Drought,G + H.GF GxE,0.642668945,0.020795637,0.602087064,0.028491573
2016-17,Severe Drought,A + H.GF GxE,0.627093615,0.024868224,0.590315513,0.032238506
2016-17,Severe Drought,H.ALL,0.625999541,0.040019829,0.624651031,0.02632807
2016-17,Severe Drought,G + H.ALL GxE,0.68102964,0.036013757,0.629476493,0.023826208
2016-17,Severe Drought,A + H.ALL GxE,0.675258409,0.026512379,0.620638461,0.024266073
2016-17,Heat,G,0.216275946,0.014936758,0.17683006,0.016631662
2016-17,Heat,A,0.215237589,0.014801934,0.176479011,0.014980509
2016-17,Heat,G + G GxE,0.433567755,0.021968869,0.382630639,0.022226929
2016-17,Heat,A + A GxE,0.45940238,0.022233713,0.415712265,0.021348331
2016-17,Heat,H.HEAD,0.612211734,0.016037969,0.531546878,0.027681722
2016-17,Heat,G + H.HEAD GxE,0.609721026,0.014581346,0.526509978,0.023703292
2016-17,Heat,A + H.HEAD GxE,0.6105201,0.015863151,0.528170851,0.027245756
2016-17,Heat,H.GF,0.501269178,0.027422923,0.453846944,0.029765917
2016-17,Heat,G + H.GF GxE,0.5026278,0.031255711,0.441921915,0.035645935
2016-17,Heat,A + H.GF GxE,0.504918986,0.031484112,0.446038481,0.034648141
2016-17,Heat,H.ALL,0.486996283,0.028950399,0.483643529,0.039176256
2016-17,Heat,G + H.ALL GxE,0.482175525,0.025668785,0.443616854,0.032251239
2016-17,Heat,A + H.ALL GxE,0.485990323,0.0250533,0.452692951,0.030183249
